# Supplementary material
Source: Springer Nature journal article supplement (https://www.springermedizin.de/resource/supplementary/13058_2013_3376_MOESM3_ESM.pdf/9703992)

A

normal (N)  
 none (S0) 8.1%  
 weak (S1) 21.6%  
 medium (S2) 24.3%  
 strong (S3) 45.9%

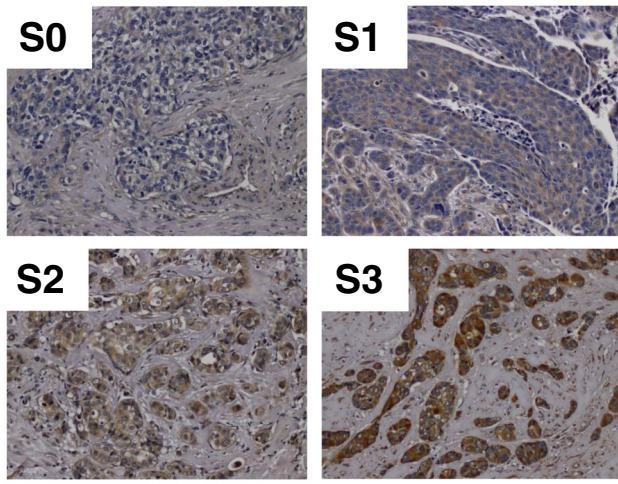

normal tissue

breast cancer tissue

B

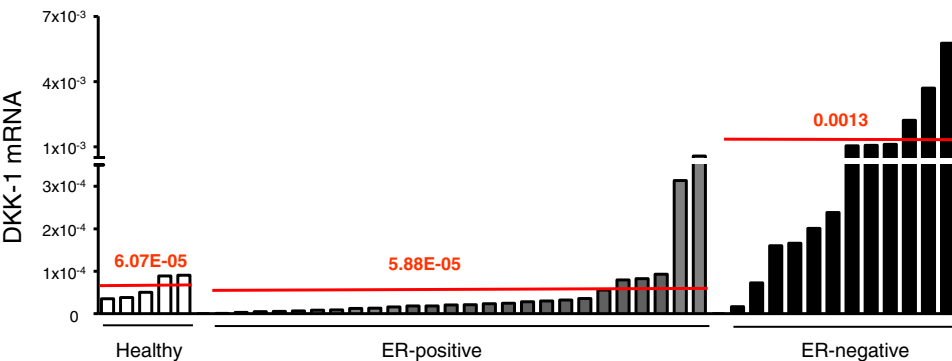

C

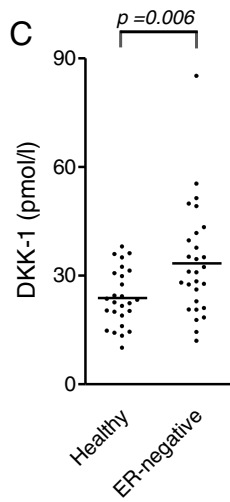

Supplement: MOESM3 [file 9703992]
